# Supplementary material
Source: PubMed Central journal article supplement (PMC3318129)
Supplement: mmc1.pdf [file mmc1.pdf]

**Two different binding modes of  $\alpha$ -Synuclein to lipid vesicles depending on its aggregation state**

**Supportive Information**

*Quantification of the bound fraction of  $\alpha$ S* - The fluorescence data were quantitatively evaluated using the *FIDA-Analyze* software (Evotec-Technologies, Hamburg, Germany). FIDA parameters (particles brightness  $Q$  and concentration  $C$ ) and FCS parameters (diffusion time  $\tau$  and particle number  $N$ ) were calculated by fitting the measurement data (1-3). From SIFT measurements the red particle brightness of unbound monomeric  $\alpha$ S ( $Q_1$ ) was first determined from the 1D-FIDA analysis of a solution 10 nM of monomeric  $\alpha$ S. Upon addition of vesicles the concentration of unbound  $\alpha$ S ( $C_1$ ), the concentration of vesicles with bound  $\alpha$ S ( $C_2$ ) and the red brightness of these vesicles ( $Q_2$ ) were derived by fitting the parameters to the FIDA data (setting  $Q_1$  to a fix value obtained from the brightness of  $\alpha$ S in solution). Subsequently the fraction bound  $\alpha$ S was derived from  $C_2Q_2/(C_1Q_1+C_2Q_2)$  and the amount of  $\alpha$ S bound per vesicle from  $Q_2/Q_1$  (Table 1S, A). In aggregation experiments, a heterogeneous population of red particles was formed. Nevertheless the average concentration ( $C_2$ ) and the brightness ( $Q_2$ ) of the oligomers, and the concentration of the remaining monomers ( $C_1$ ) were estimated by data fitting. The fraction of aggregated  $\alpha$ S was derived from  $C_2Q_2/(C_1Q_1+C_2Q_2)$ .

From FCS measurements the diffusion time  $\tau_{\text{suV}}$  of the vesicles and  $\tau_{\alpha\text{S}}$  of unbound  $\alpha$ S were first determined independently from the green and red fluorescence autocorrelation curves of stock solutions of 10  $\mu$ M vesicles and 10 nM  $\alpha$ S respectively. When the autocorrelation of  $\alpha$ S was evaluated in the presence of vesicles the curve was in-between the curves of the vesicles and the free  $\alpha$ S depending on the fraction bound  $\alpha$ S. The fractions of unbound and bound  $\alpha$ S were determined by fitting the autocorrelation curve of  $\alpha$ S to  $\tau_{\text{suV}}$  and  $\tau_{\alpha\text{S}}$  (3)(Tabe 1S, B). The hydrodynamic radius ( $r_h$ ) of the particles was derived combining Einstein's equation for 3-dimensional Brownian motion ( $\Delta r^2 = 6Dt$ )(4) and Stokes-Einstein equation ( $r_h = k_B T / (6\pi\eta D)$ ), where  $D$  is the diffusion constant of the particles,  $\eta$  the viscosity of the medium.  $\Delta r$  is the radius of the focus of the laser (approximately 0.75  $\mu$ m). FCS analysis was not useful for  $\alpha$ S aggregates, since these structures diffuse very slowly, bleach, and are detected only inefficiently when no scanning device is used.

**A.**

| FIDA              | $C_1$<br>[ $\alpha S_{free}$ ] | $Q_1$ (fix)<br>[ $\alpha S_{free}$ ] | $C_2$<br>[ $\alpha S_{bound}$ ] | $Q_2$<br>[ $\alpha S_{bound}$ ] | $\alpha S_{bound}$<br>[%] |
|-------------------|--------------------------------|--------------------------------------|---------------------------------|---------------------------------|---------------------------|
| $\alpha$ -Syn-647 | 3,06                           | 27,00                                | 1,82                            | 125,51                          | 74                        |

**B.**

| FCS                             | $\tau_{\alpha S}$<br>(unbound)<br>[ $\mu$ sec] | $\tau_{SUV}$<br>[ $\mu$ sec] | $\alpha S_{free}$<br>[%] | $\alpha S_{bound}$<br>[%] |
|---------------------------------|------------------------------------------------|------------------------------|--------------------------|---------------------------|
| $\alpha$ -Syn-647 +<br>DPPC-SUV | 1000                                           | 6600                         | 17                       | 83                        |

**Table 1S.** Quantitative evaluation of  $\alpha S$  binding to DPPC-SUV**References:**

1. Bieschke, J., A. Giese, W. Schulz-Schaeffer, I. Zerr, S. Poser, M. Eigen, and H. Kretschmar. 2000. Ultrasensitive detection of pathological prion protein aggregates by dual-color scanning for intensely fluorescent targets. *Proc Natl Acad Sci U S A* 97:5468-5473.
2. Kask, P., K. Palo, D. Ullmann, and K. Gall. 1999. Fluorescence-intensity distribution analysis and its application in biomolecular detection technology. *Proc Natl Acad Sci U S A* 96:13756-13761.
3. Rhoades, E., T. F. Ramlall, W. W. Webb, and D. Eliezer. 2006. Quantification of alpha-synuclein binding to lipid vesicles using fluorescence correlation spectroscopy. *Biophys J* 90:4692-4700.
4. Bloomfeld, V. A. 2000. Survey of Biomolecular Hydrodynamics. In *On-line Biophysics Textbook*. T. M. Schuster, editor. 1-16.

# Supporting information.

1

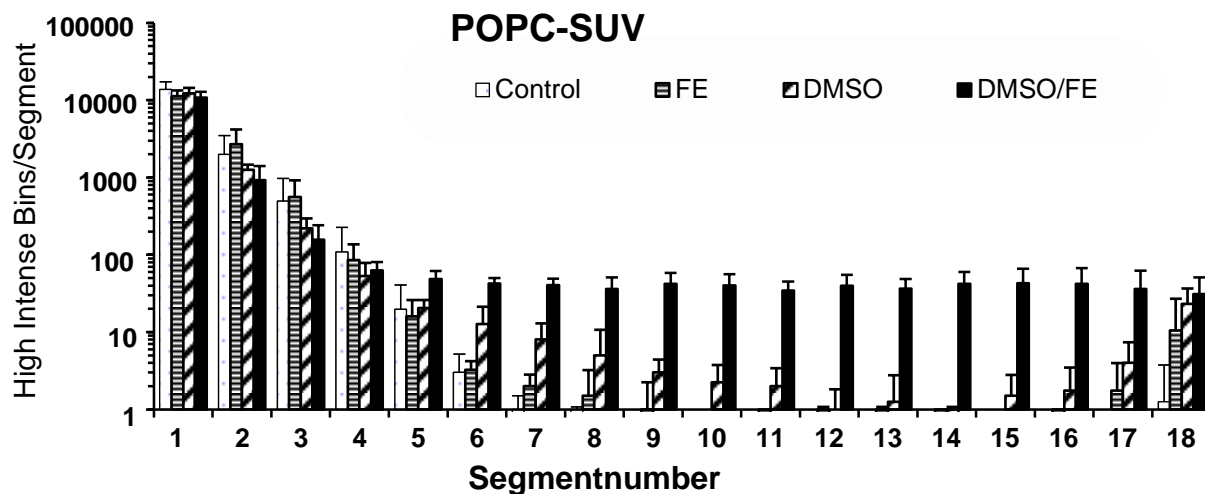

2

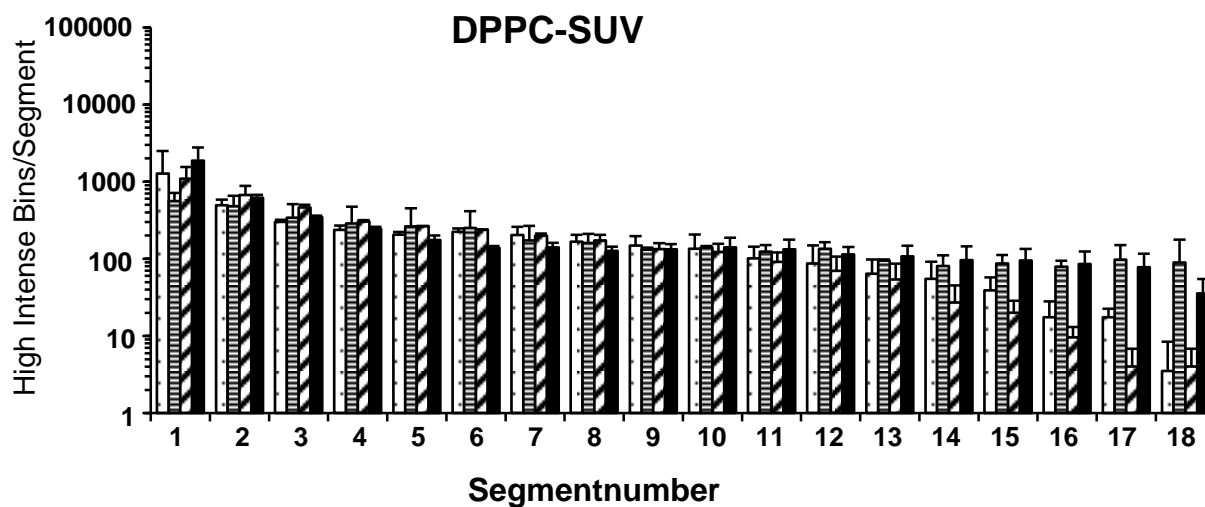

**Figures S1 and S2.**

**Quantitative SIFT analysis for the experiments shown in Figure 2B and 2C.**

For quantification of high-intensity bins, we used segments depicted in Figure 2A. S1 shows the mean  $\pm$  S.E. of 20 measurements obtained in 4 experiments, S2 shows the mean  $\pm$  S.E. of 10 measurements obtained in 2 experiments. In presence of POPC-SUV, dual-colour high-intensity bins in segments 6-16 are found virtually only in presence of DMSO/Fe<sup>3+</sup>. This indicates lipid binding of iron-induced  $\alpha$ S-oligomers. In contrast, in the presence of DPPC-SUV the distribution of high-intensity bins among the different segments remains similar regardless of the addition of DMSO and/or iron. A further difference between S1 and S2 is that the number of high-intensity bins in segment 1, which indicates the presence of purely green particles (i.e. vesicles with no  $\alpha$ S bound), is much higher for POPC-SUV in all conditions tested.

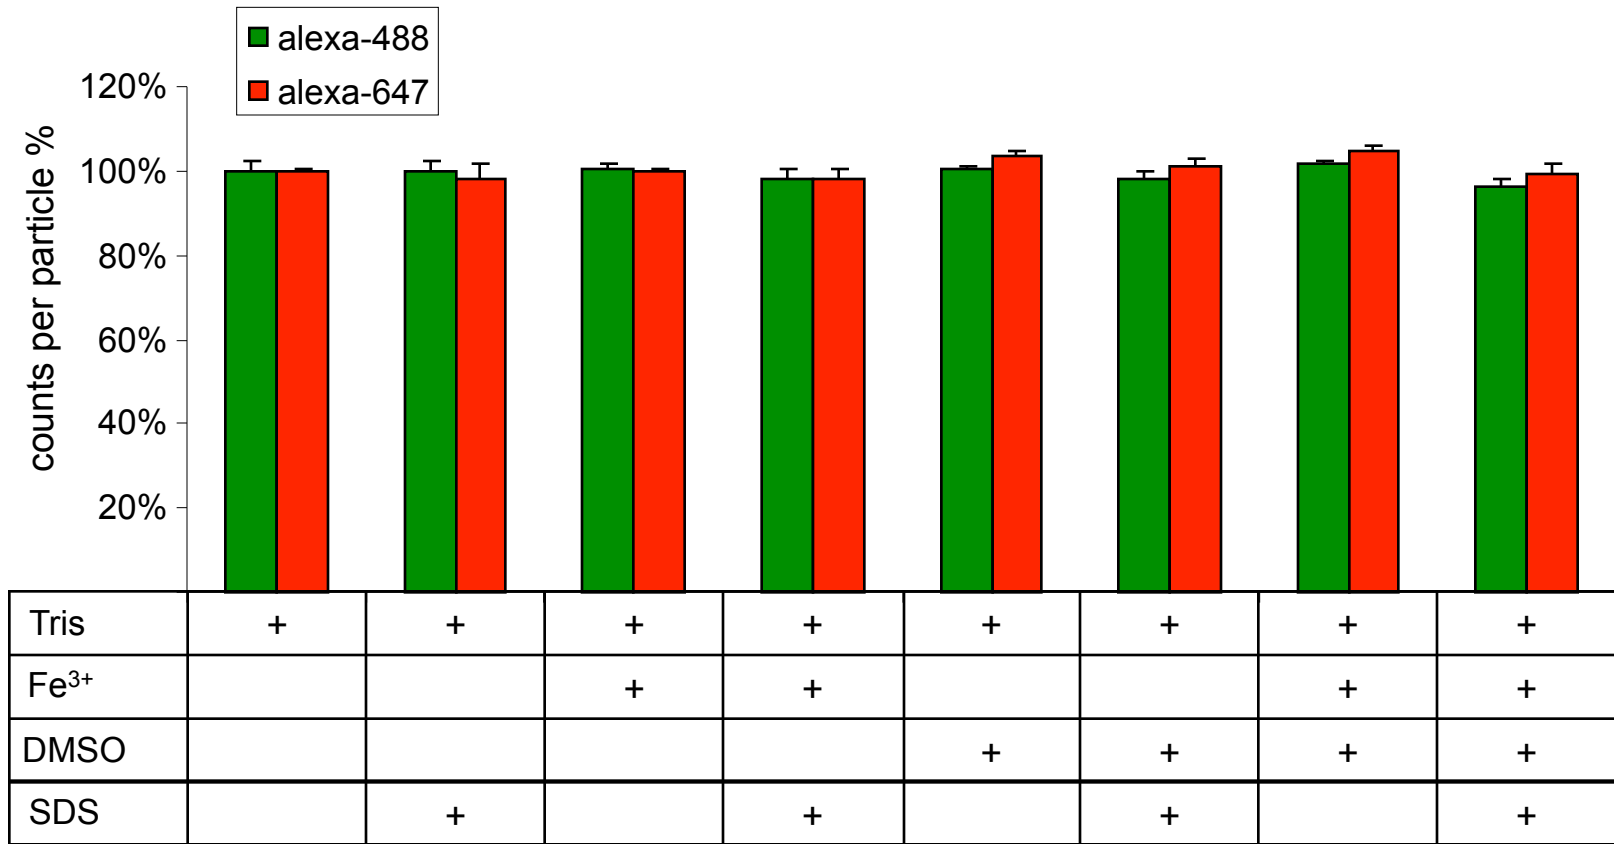

*Supplementary Figure S3: Influence of buffer conditions on the fluorescence properties of fluorescent dyes Alexa488 and Alexa647* – Solutions containing Alexa-488 and Alexa-647 in 50 mM Tris buffer, pH 7.0, in a total assay volume of 20  $\mu$ L were measured with a stationary focus of the FCS reader. In parallel, samples containing final concentrations of either 10  $\mu$ M FeCl<sub>3</sub>, DMSO (1% v/v), SDS (0,2% v/v) or all possible combinations, respectively, were measured. The measurement data were evaluated by autocorrelation analysis. Mean values and standard deviation of the individual particle brightness (counts per particle) [kHz] of five consecutive measurements were normalized to the mean counts per particle obtained for Alexa-488 or Alexa-647.
